# Supplementary material for: Low-temperature synthesized self-supported single-crystalline LiCoO2 nanoflake arrays as advanced 3D cathodes for flexible lithium-ion batteries
Source: Royal Society of Chemistry journal article supplement (doi:10.1039/c9ta00351g), 2019-01-01
Supplement: c9ta00351g1.pdf [file c9ta00351g1.pdf]

## Electronic Supplementary Information

### Low-temperature synthesized self-supported single-crystalline LiCoO<sub>2</sub> nanoflake arrays as advanced 3D cathodes for flexible lithium-ion batteries

Qiuying Xia<sup>†a,b</sup>, Mingzhu Ni<sup>†a,b</sup>, Minghua Chen<sup>c</sup>, Hui Xia<sup>\*a,b</sup>

<sup>a</sup>School of Materials Science and Engineering, Nanjing University of Science and Technology, Nanjing 210094, China

<sup>b</sup>Herbert Gleiter Institute of Nanoscience, Nanjing University of Science and Technology, Nanjing 210094, China

<sup>c</sup>Key Laboratory of Engineering Dielectric and Applications (Ministry of Education), Harbin University of Science and Technology, Harbin 150080, China

<sup>†</sup>Both authors contributed equally to this work

#### Corresponding Author

\*E-mail: xiahui@njjust.edu.cn

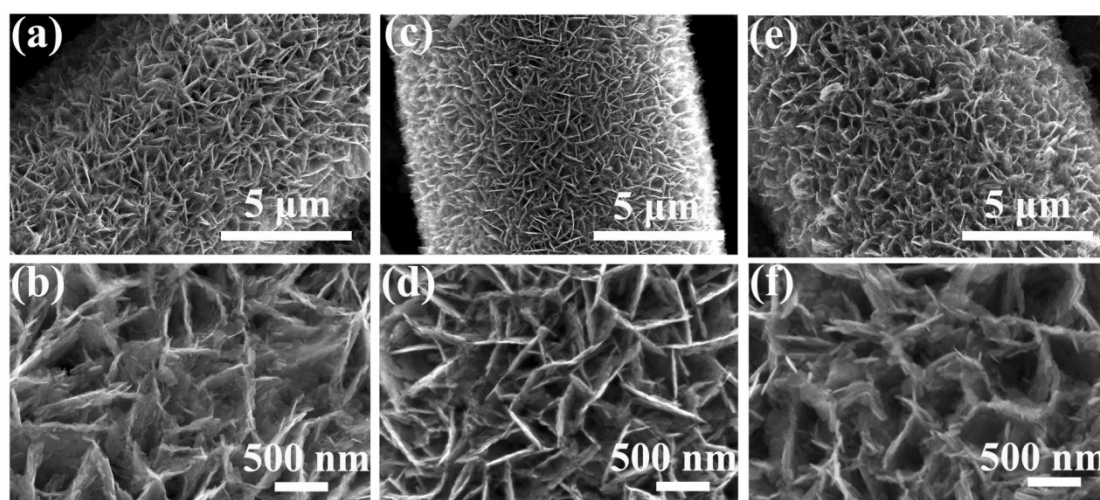

**Fig. S1** FESEM images of the final LiCoO<sub>2</sub> samples synthesized at (a,b) 100 °C, (c,d) 120 °C, and (h,i) 140 °C.

---

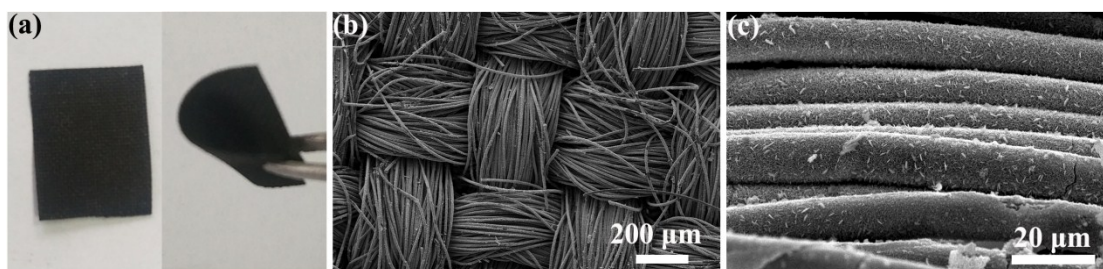

**Fig. S2** (a) Digital image and (b,c) Low magnification FESEM images of the carbon fibers of the carbon cloth with high flexibility are uniformly covered with  $\text{LiCoO}_2$  nanoflake arrays (the final  $\text{LiCoO}_2$  sample synthesized at 200 °C).

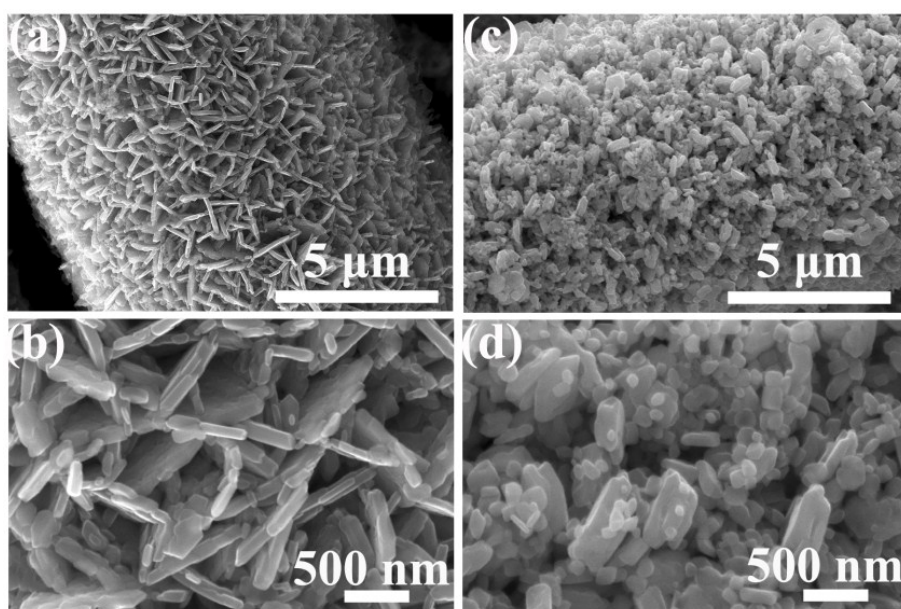

**Fig. S3** FESEM images of the final  $\text{LiCoO}_2$  samples synthesized at (a,b) 220 °C and (c,d) 240 °C.

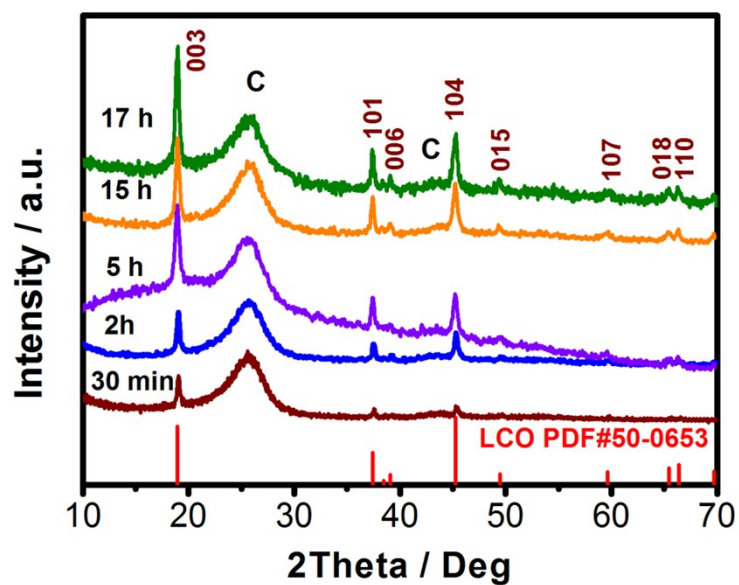

**Fig. S4** XRD patterns of the LiCoO<sub>2</sub> samples hydrothermally treated at 200°C for different time.

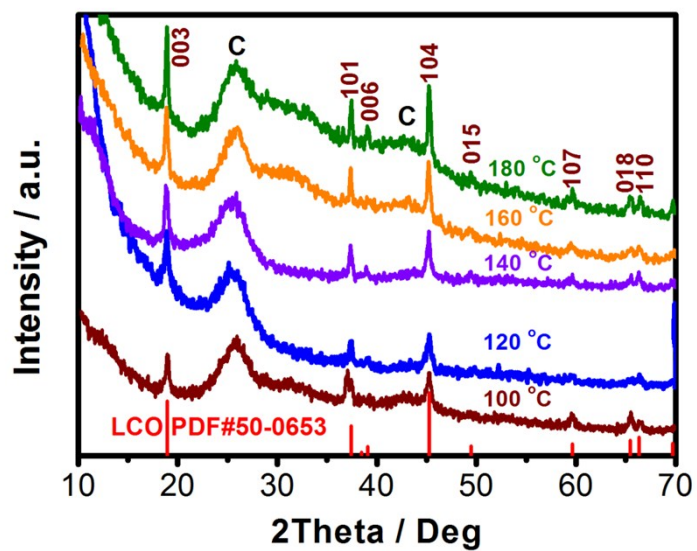

**Fig. S5** XRD patterns of the final LiCoO<sub>2</sub> samples synthesized at different hydrothermal temperature.

**Table S1.** The Rietveld refinement results of the final 200 °C synthesized LiCoO<sub>2</sub> powder scraped off from the carbon cloth.

| Sample             | a (Å)   | c (Å)    | V (Å <sup>3</sup> ) | Rwp (%) |
|--------------------|---------|----------|---------------------|---------|
| LiCoO <sub>2</sub> | 2.82038 | 14.08821 | 97.05               | 2.62    |

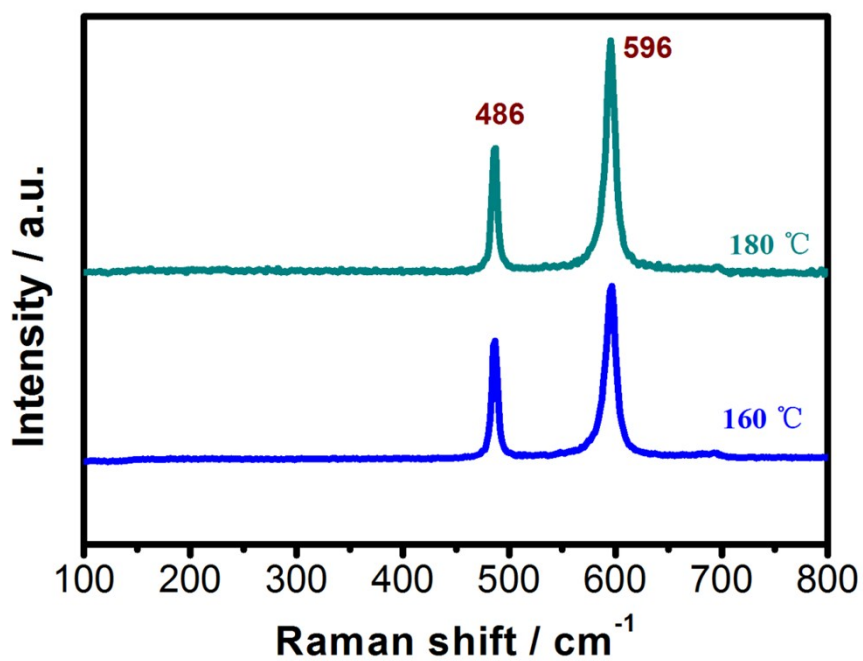

**Fig. S6** Raman spectra of the final LiCoO<sub>2</sub> samples synthesized at 160 °C and 180 °C.

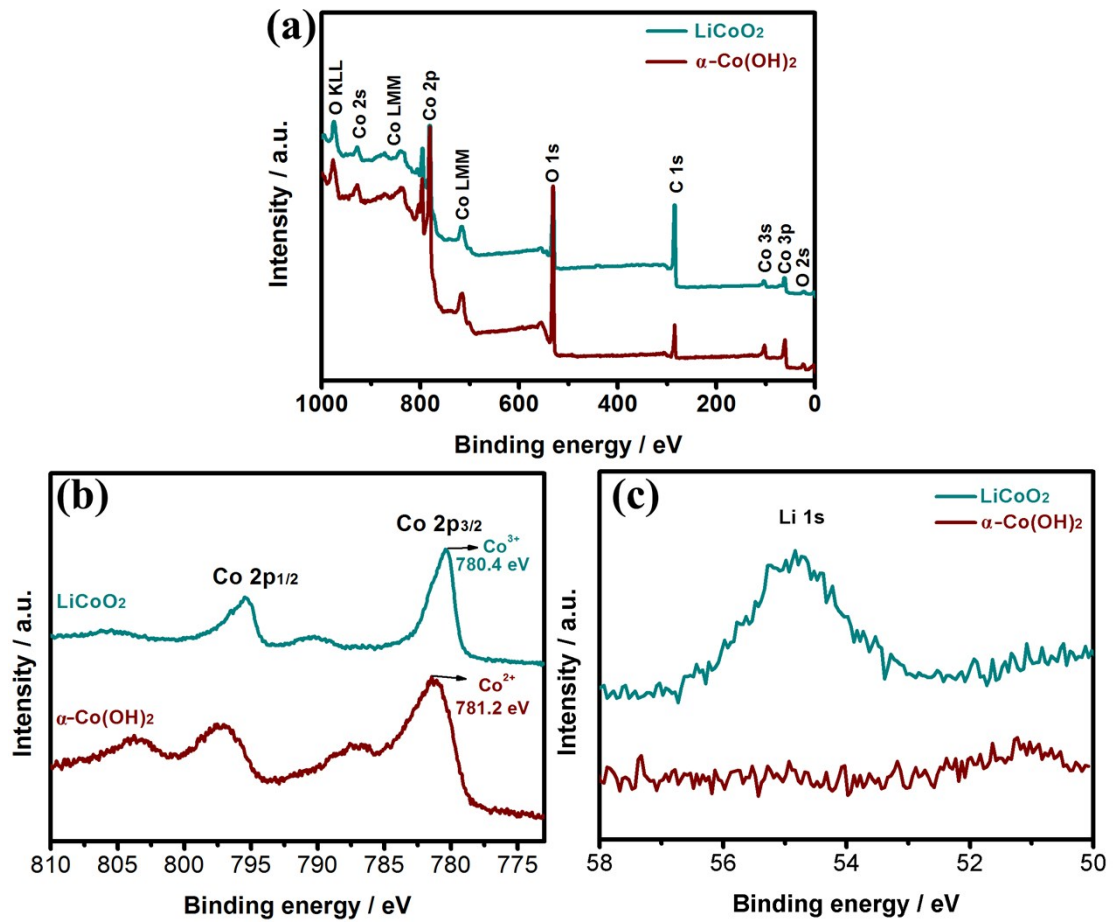

**Fig. S7** (a) Survey-scan XPS spectra, (b) Co 2p core-level XPS spectra, and (c) Li 1s core-level XPS spectra of the as-prepared  $\alpha\text{-Co(OH)}_2$  sample and the final 200 °C synthesized  $\text{LiCoO}_2$  sample.



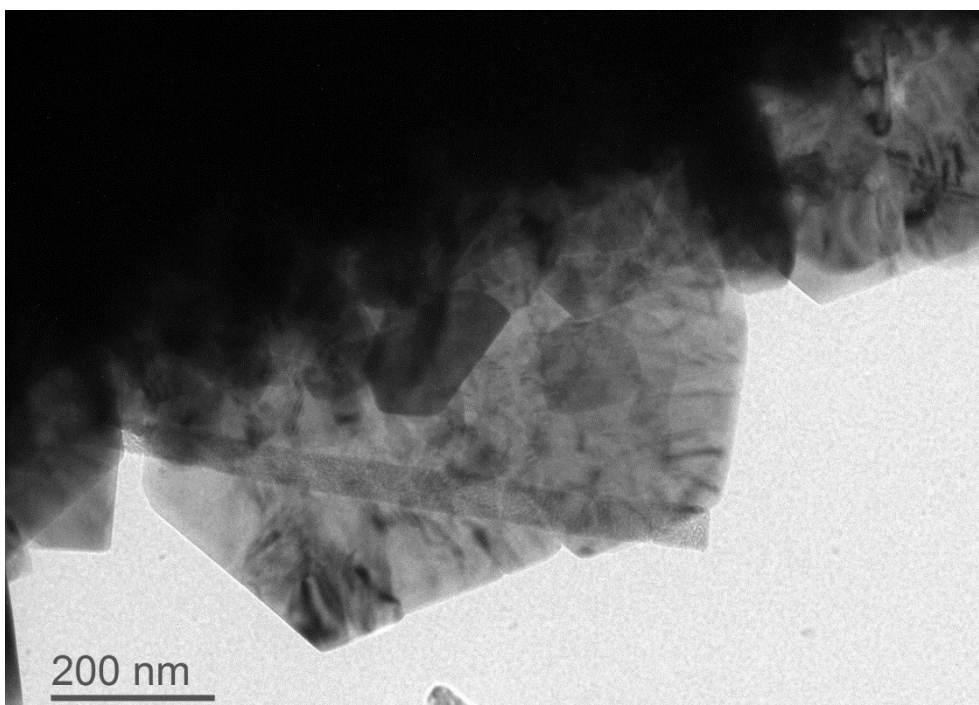

**Fig. S8** TEM image of the final 200 °C synthesized LiCoO<sub>2</sub> nanoflake on carbon cloth.

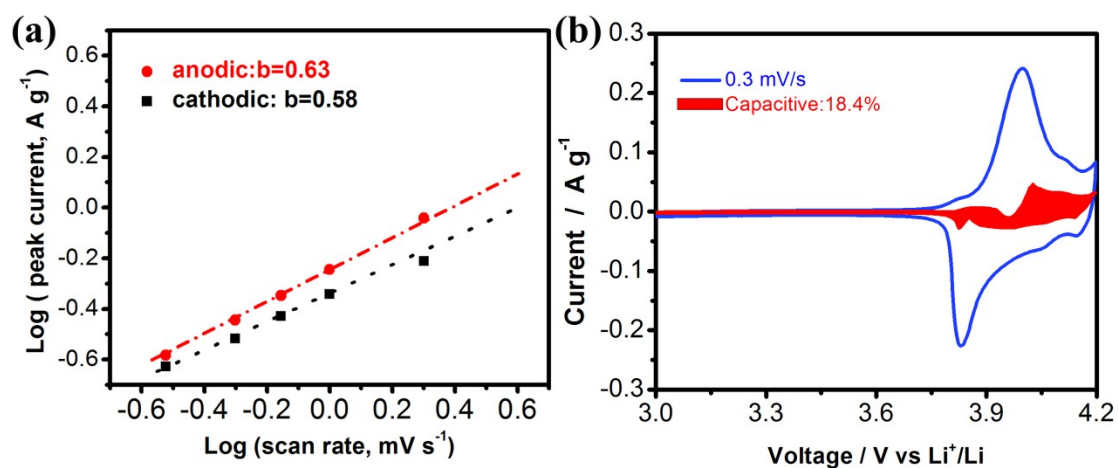

**Fig. S9** (a) Log  $i$  (peak current) vs. log  $v$  (scan rate) plots for both cathodic and anodic scans of the LCO-200 electrode. (b) CV curve at a scan rate of 0.3 mV s<sup>-1</sup> of the LCO-200 electrode with red area representing the surface capacitive contribution.

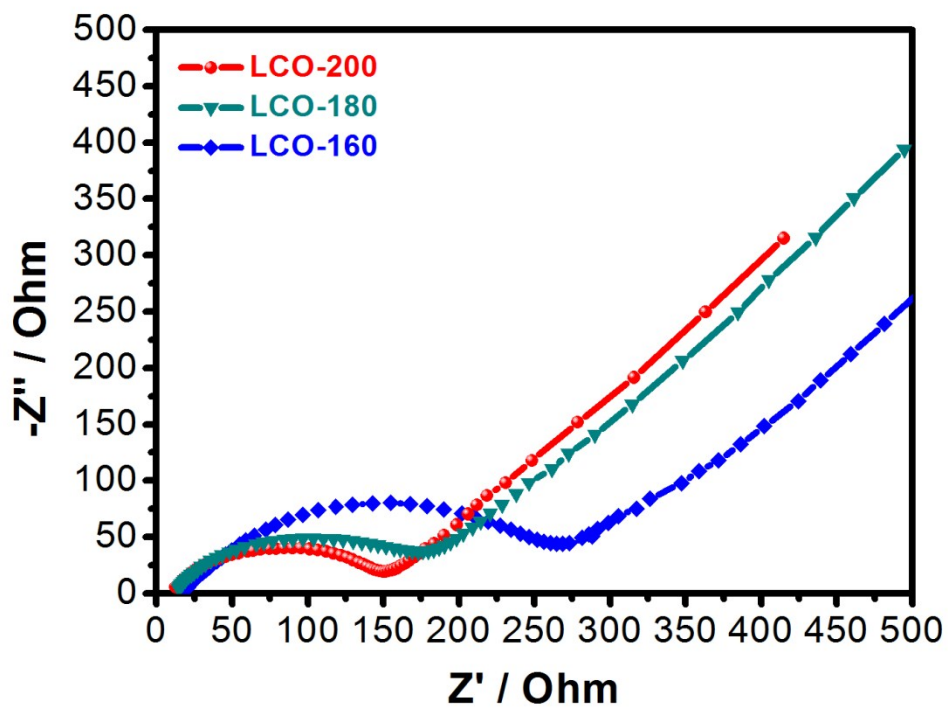

**Fig. S10** Nyquist plots of the LCO-200, LCO-180 and LCO-160 electrodes.

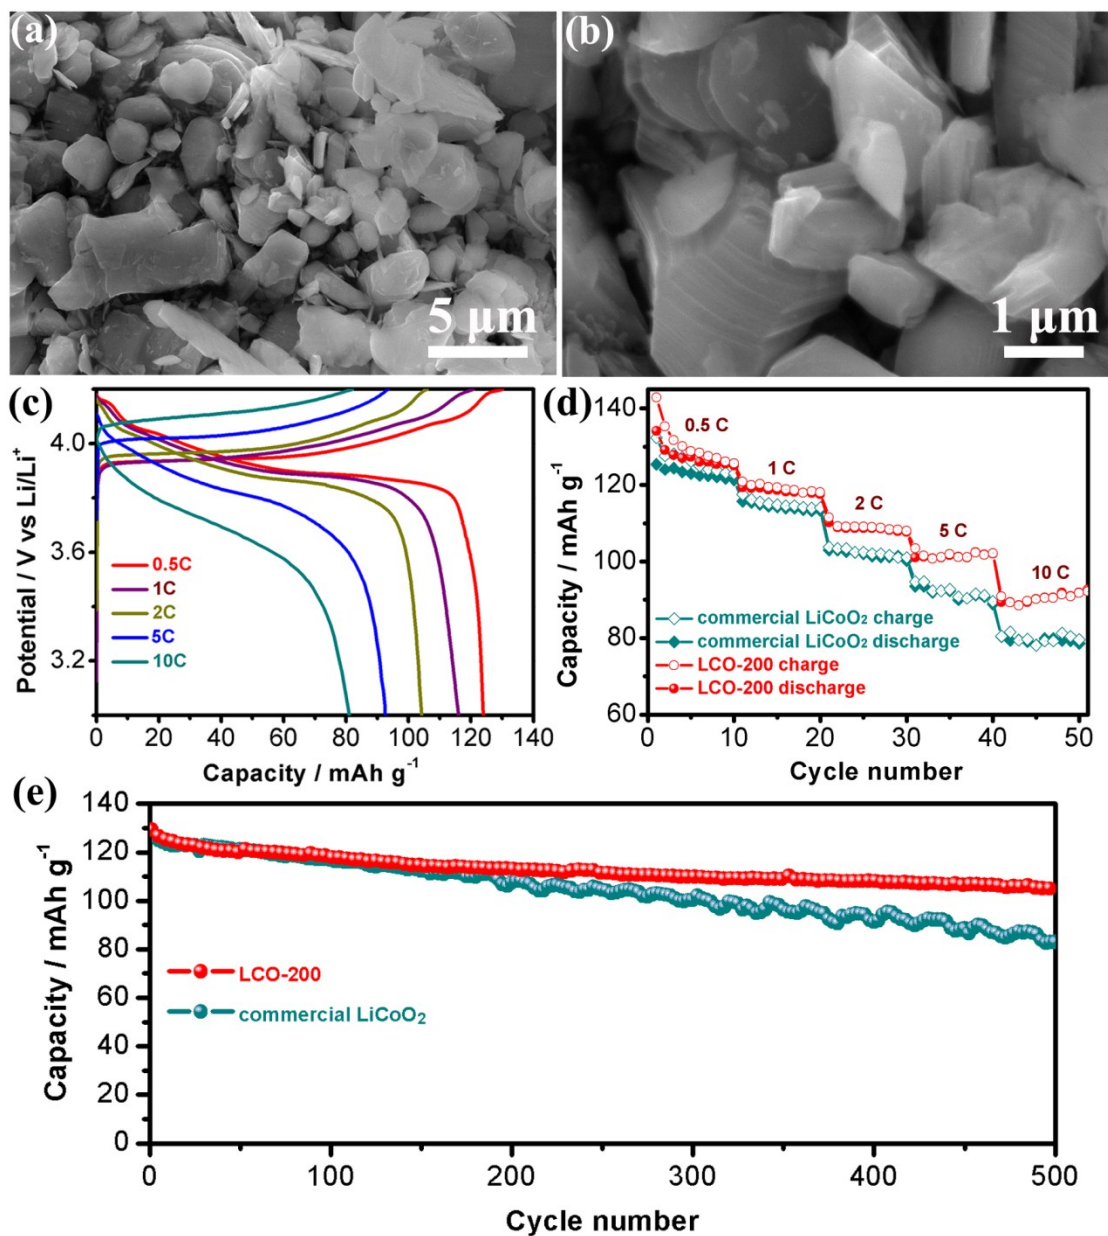

**Fig. S11** (a,b) FESEM images of the commercial LiCoO<sub>2</sub> powder. (c). Charge and discharge curves of the commercial LiCoO<sub>2</sub> electrode at different current rates. (d) Rate performances and (e) cycle performance of the LCO-200 and the commercial LiCoO<sub>2</sub> powder electrodes.



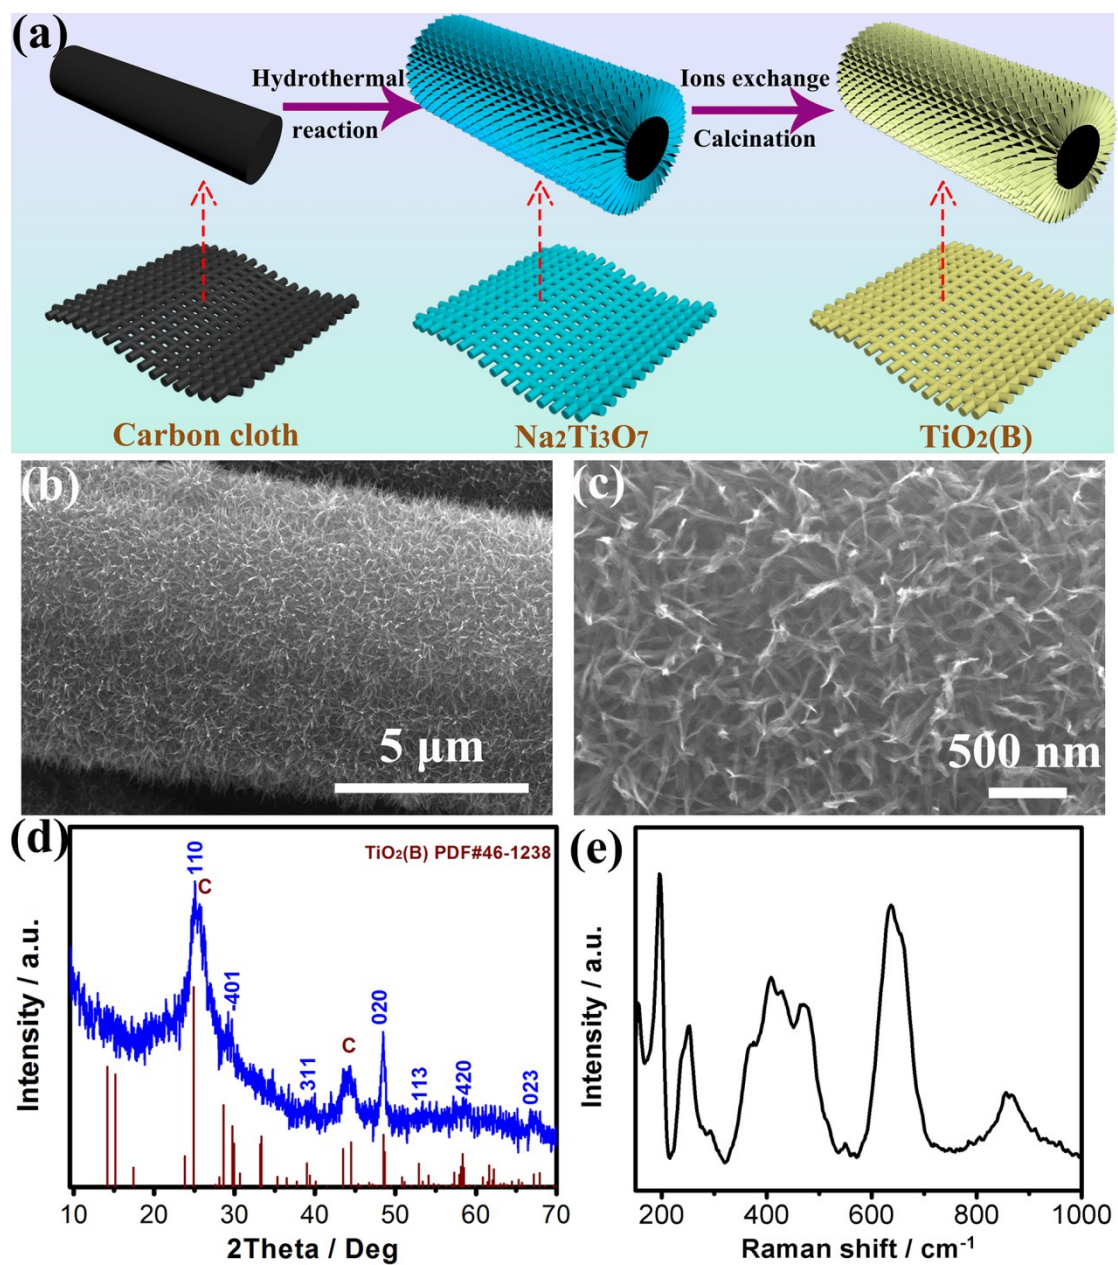

**Fig. S12** (a) Schematic illustration of fabrication procedure of the 3D  $\text{TiO}_2(\text{B})$  nanosheet arrays on carbon cloth. (b,c) FESEM images, (d) XRD pattern, and (e) Raman spectrum of the  $\text{TiO}_2(\text{B})$  nanosheet arrays.

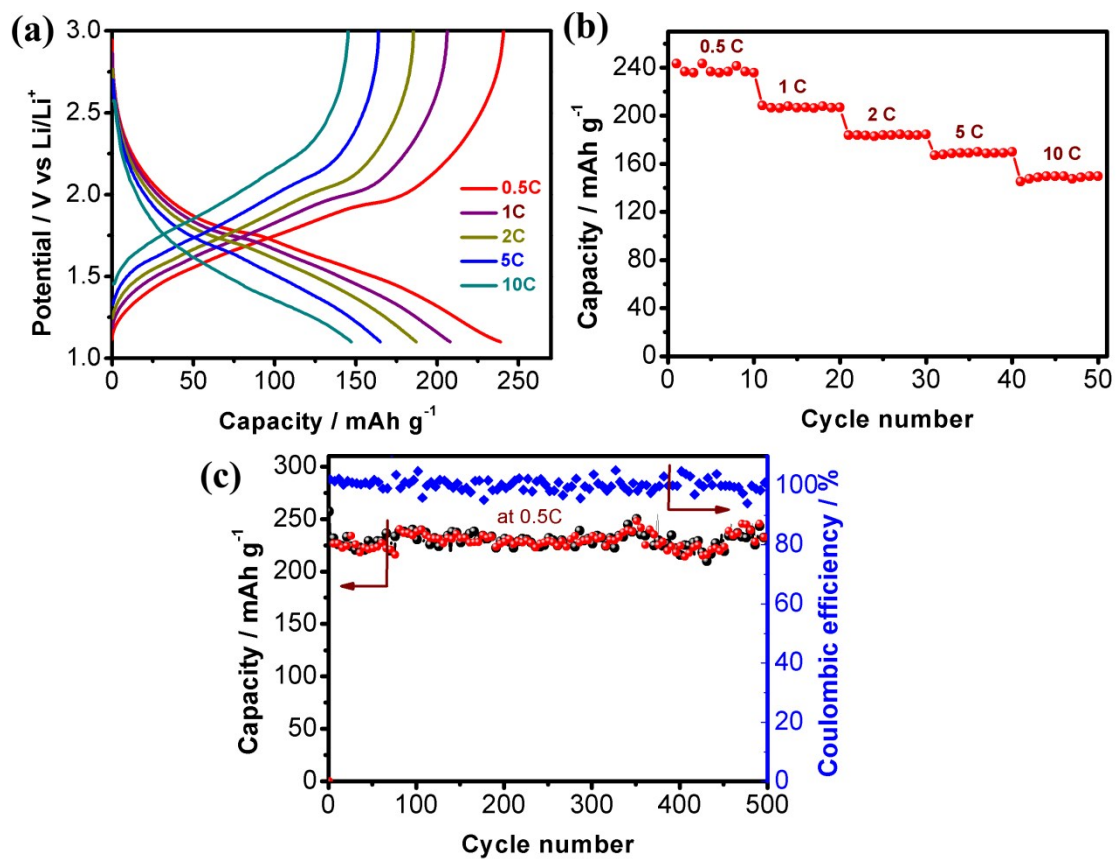

**Fig. S13** (a) Charge and discharge curves at different current rate, (b) Rate performance, and (c) cycle performance at 0.5 C of the 3D TiO<sub>2</sub>(B) electrode.

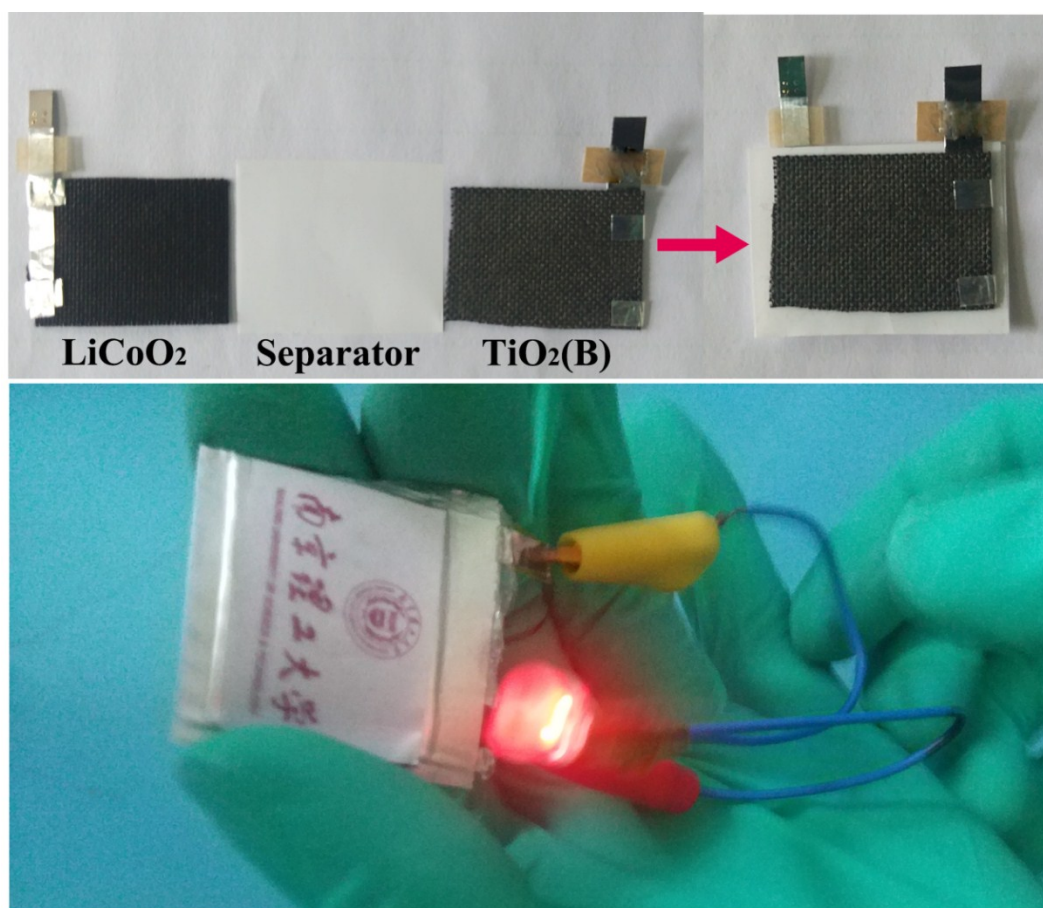

**Fig. S14** Optical images of the all-nanoarrays-based flexible LIBs using carbon cloth supported  $\text{LiCoO}_2$  nanoflake arrays as cathode and carbon cloth supported  $\text{TiO}_2(\text{B})$  nanosheet arrays as anode.

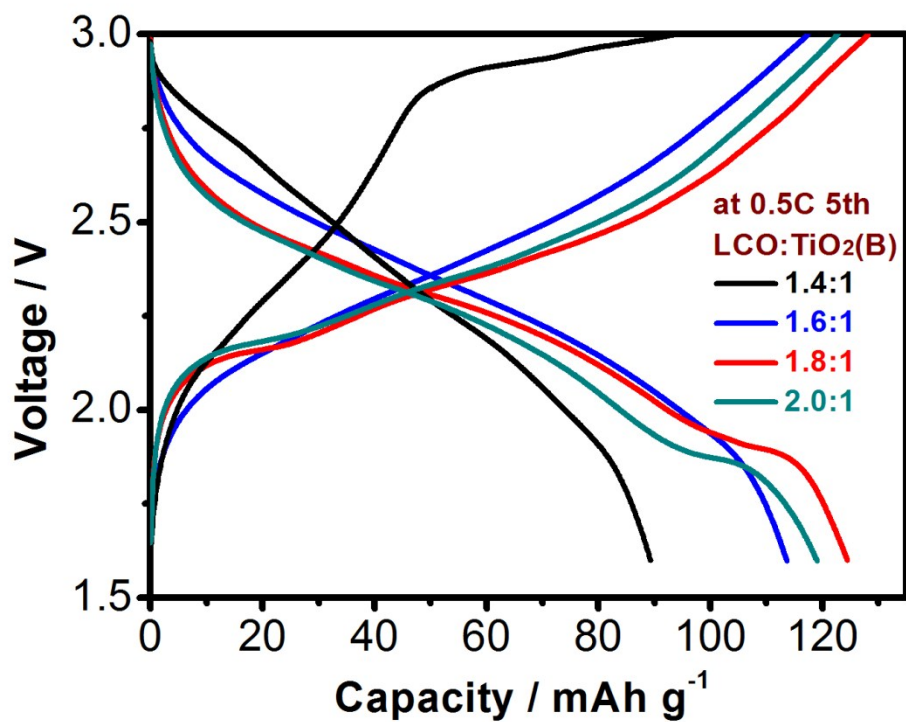

**Fig. S15** The charge/discharge curves of the 5th cycle at 0.5 C (the current rate is based on the cathode) of the LCO/TiO<sub>2</sub>(B) full cells with different cathode to anode ratios from 1.4:1 to 2.0:1.

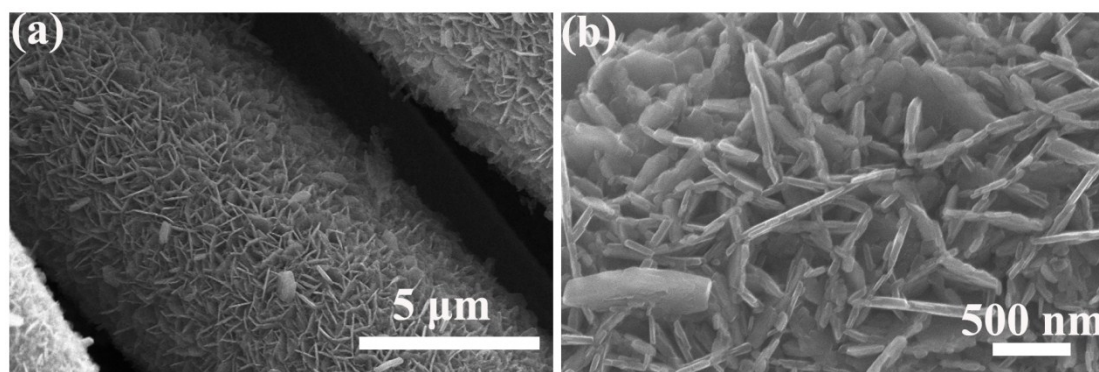

**Fig. S16** FESEM images of the LCO-200 electrode after 500 charge/discharge cycles at a current rate of 0.5 C.



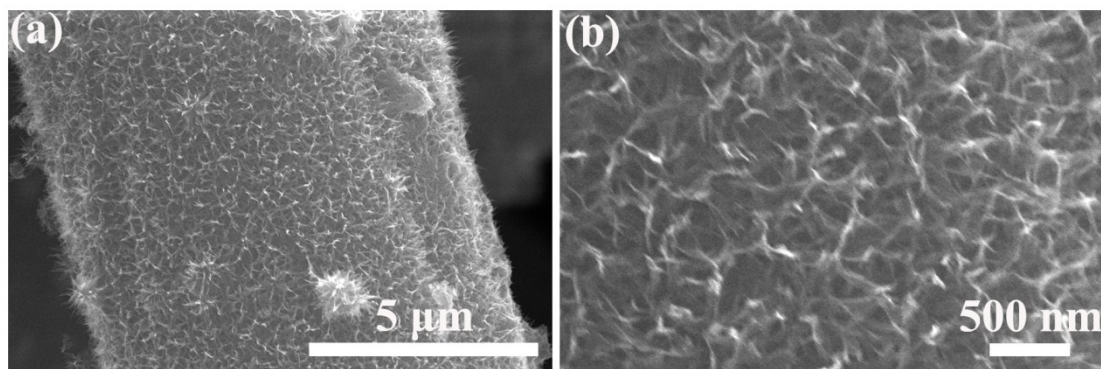

**Fig. S17** FESEM images of the  $\text{TiO}_2(\text{B})$  electrode after 500 charge/discharge cycles at a current rate of 0.5 C.

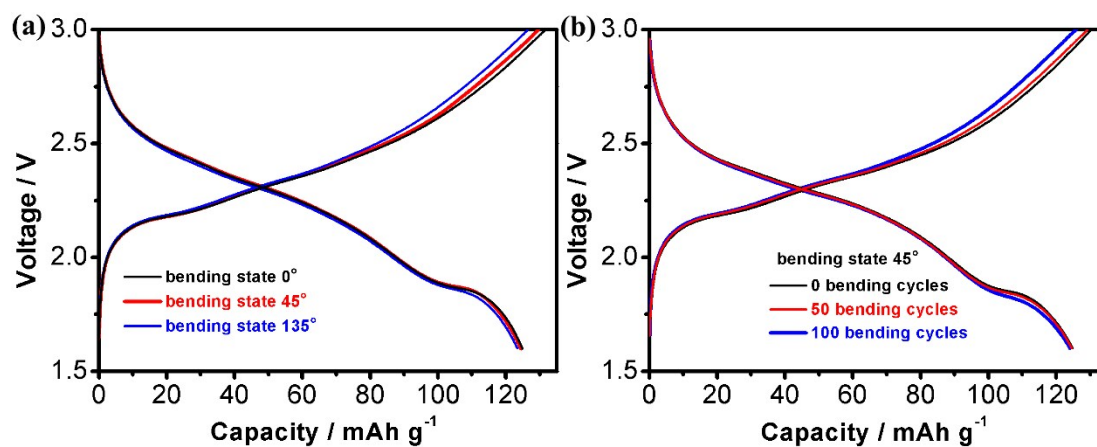

**Fig. S18** Charge/discharge curves of the flexible LCO// $\text{TiO}_2(\text{B})$  full cell at (a) different bending states at 0.5C, and (b) different bending cycles at 45° bending state at 0.5C .



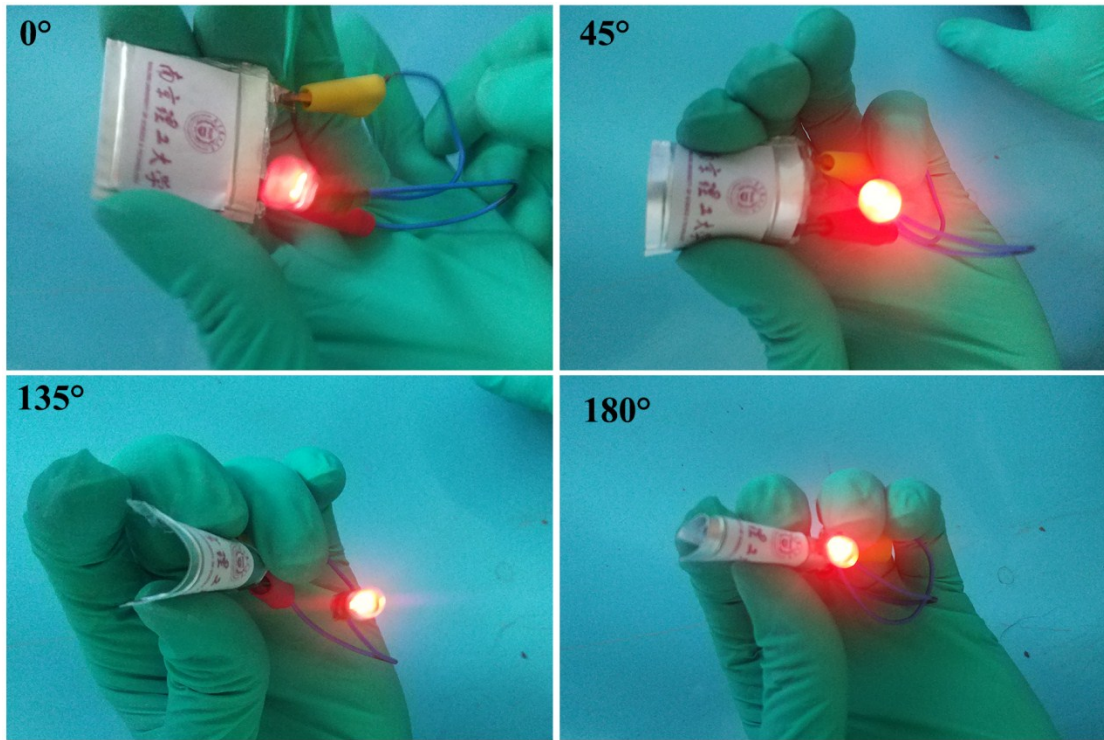

**Fig. S19** Optical images of the flexible LCO//TiO<sub>2</sub>(B) full cell lighting a LED at different bending states.
